# The arrow-of-time in neuroimaging time series identifies causal triggers of brain function

Thomas A. W. Bolton<sup>a,b</sup>, Dimitri Van De Ville<sup>c,d</sup>, Enrico Amico<sup>c,d</sup>, Maria G. Preti<sup>c,d,e</sup>, and Raphaël Liégeois<sup>\*,c,d</sup>.

<sup>a</sup>Connectomics Laboratory, Department of Radiology, Centre Hospitalier Universitaire Vaudois, Switzerland

<sup>b</sup>Department of Clinical Neurosciences, Centre Hospitalier Universitaire Vaudois, Switzerland

<sup>c</sup>Institute of Bioengineering, Center for Neuroprosthetics, École Polytechnique Fédérale de Lausanne, Switzerland

<sup>d</sup>Department of Radiology and Medical Informatics, University of Geneva, Switzerland

<sup>e</sup>CIBM Center for Biomedical Imaging, Switzerland

## Abstract

Moving from *association* to *causal* analysis of neuroimaging data is crucial to advance our understanding of brain function. The arrow-of-time (AoT), *i.e.*, the known asymmetric nature of the passage of time, is the bedrock of causal structures shaping physical phenomena. However, almost all current time series metrics do not exploit this asymmetry, probably due to the difficulty to account for it in modelling frameworks. Here, we introduce an AoT-sensitive metric that captures the intensity of causal effects in multivariate time series, and apply it to high-resolution functional neuroimaging data. We find that that causal effects underlying brain function are more clearly localized in space and time than functional activity or connectivity, thereby allowing us to trace neural pathways recruited in different conditions. Overall, we provide a mapping of the causal brain that challenges the association paradigm of brain function.

*Keywords:* Causality, brain function, arrow-of-time, brain dynamics.

## 1 Introduction

2 The advent of functional neuroimaging has provided us with unique insight into the complex  
3 spatiotemporal structure of brain function<sup>1</sup>. This organization is classically characterized on the  
4 basis of association assessments such as functional connectivity<sup>2</sup> that was shown to reflect, *e.g.*,

---

\*To whom correspondence may be addressed.

Email: Raphael.Liegeois@epfl.ch

5 cognitive status<sup>3,4</sup> and disease<sup>5-7</sup>. However, the usefulness of this approach has been increasingly  
 6 questioned as it bears crucial limits in understanding neural communication and pathways<sup>8,9</sup>.  
 7 Therefore, it is crucial to move from association to causal frameworks to improve the interpretation  
 8 of functional neuroimaging datasets<sup>10</sup>.

9 Various approaches have been proposed to extract causal structure from functional imaging time  
 10 series. They include dynamic causal modelling<sup>11,12</sup>, multivariate autoregressive modelling<sup>13,14</sup>,  
 11 Granger causality<sup>15,16</sup>, and more application-oriented variants of these<sup>17</sup>. Most, however, do not  
 12 directly exploit the known asymmetric nature of the passage of time, also called the *arrow-of-*  
 13 *time*<sup>18</sup> (AoT, Fig. 1A). Since the *cause and effect* pattern fundamentally builds upon the AoT, we  
 14 hypothesize that defining AoT-sensitive metrics of neuroimaging time series will provide unique  
 15 insights into the causal structure of brain function.

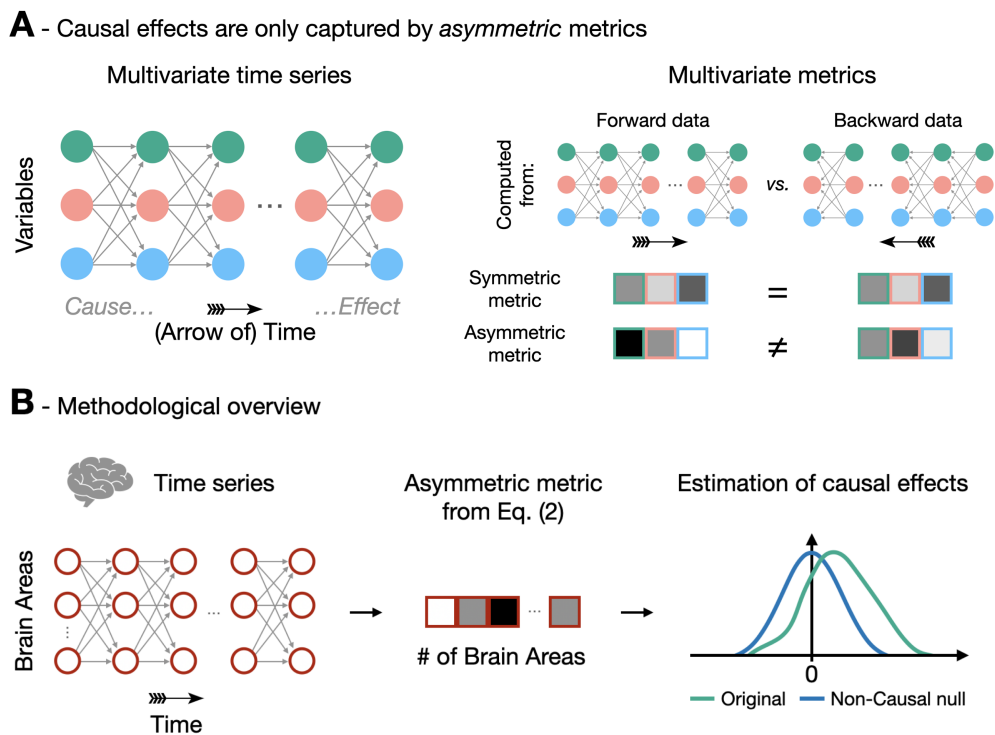

Figure 1: Identifying causal effects in neuroimaging time series using the arrow-of-time. *A*- Since cause precedes effect, causal effects in multivariate time series cannot be identified from metrics that are blind to the AoT. Such symmetric metrics, *e.g.*, mean or average correlation over time points, are equal in forward and backward data. In contrast, asymmetric metrics are different in forward and backward data as they are sensitive to the arrow-of-time, thereby bearing the potential of capturing causal effects. *B* - We use fMRI time series acquired during resting state and seven different tasks. The AoT signature is evaluated in these time series using Eq. (2), and the amplitude of the causal effect is assessed by comparison against null time series with no causal effects.

16 To test this, we introduce a new AoT-sensitive multivariate metric and apply it to high-  
17 resolution functional magnetic resonance imaging (fMRI) time series from the Human Connectome  
18 Project<sup>19</sup> (HCP). This metric is a multivariate extension of a previously defined measure<sup>20</sup>, and  
19 relies on the comparison of residuals of linear models identified from forward vs backward time  
20 series. More precisely, we define  $\tau$ , the AoT strength, as the difference between non-Gaussianity  
21 of the residuals of multivariate autoregressive models of forward time series and backward time  
22 series (Fig. 1B & Eq. (2), details in *Materials and Methods*). These residuals are expected to be  
23 less Gaussian when computed from forward time series<sup>21</sup>, hence we expect  $\tau$  to be positive. This  
24 metric is applied on fMRI data from 100 subjects in the resting state and when performing seven  
25 different tasks, thereby providing the AoT strength in each brain region, each condition, and as a  
26 function of time during paradigms.

27 We find that in almost all conditions, the AoT strength averaged over brain regions is positive,  
28 *i.e.*, the AoT is detected in fMRI time series and shapes their dynamics. Then, we show that  
29 patterns of brain regions acting as causal triggers or targets are more localized in space and time  
30 as compared to classical activity or connectivity patterns, complementing the ‘networked-brain’  
31 paradigm that has emerged in recent years<sup>22</sup>. Finally, the temporal fluctuations of  $\tau$  during a  
32 task paradigm allowed us to identify a causal pathway of neural activations supporting the task.  
33 Overall, our results provide unique insight into the causal structure of brain function by leveraging  
34 the asymmetric nature of the passage of time to which almost all classical functional neuroimaging  
35 metrics are blind<sup>23</sup>.

## 36 Results

### 37 *The AoT characterizes cognitive status*

38 We first evaluate  $\tau$  in all conditions as a function of the number of time points used. The AoT  
39 strength was computed for each brain region across 100 folds in which subjects were randomly  
40 ordered and their time courses were concatenated. The median across folds was taken as an  
41 estimate of regional AoT strength, and averaging was then performed across regions to derive a  
42 whole-brain AoT heuristic, referred to as  $\bar{\tau}$ . Fig. 2 (top) shows  $\bar{\tau}$  as a function of the total amount

43 of considered samples and for all paradigms. In the resting state case (left panel),  $\bar{\tau}$  progressively  
 44 increased as more time points were included, and started to plateau from  $n_s = 8000$  samples, at  
 45  $\bar{\tau} \approx 0.01$ . Thus, when sufficient data is available, the AoT is detected in resting-state fMRI time  
 46 series, confirming the presence of an underlying causal structure.

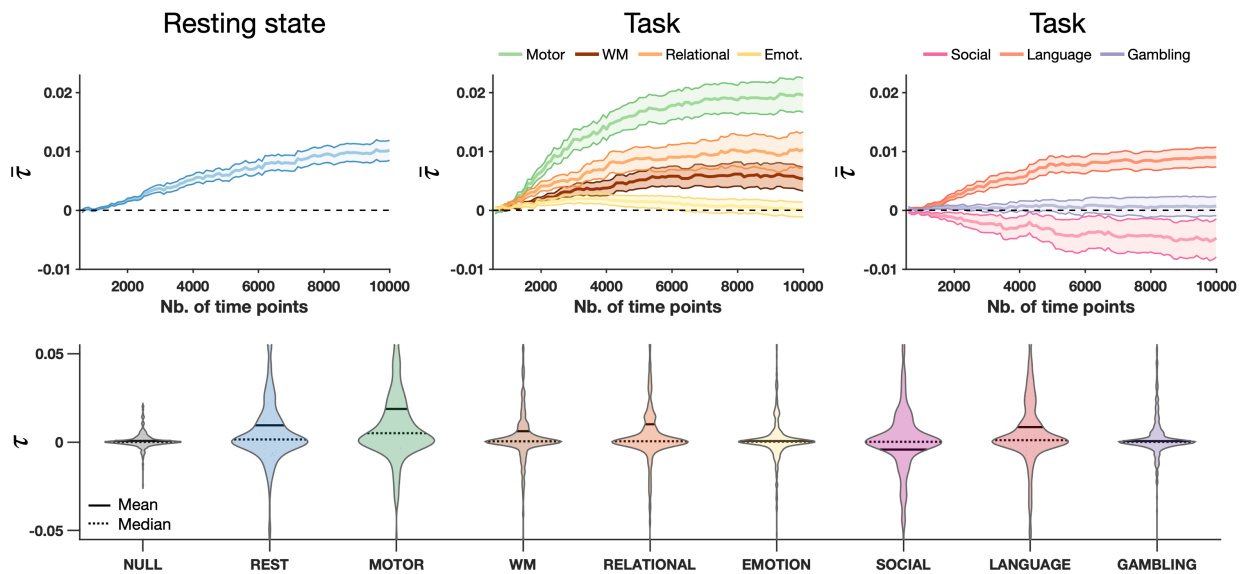

Figure 2: The arrow-of-time is detected in functional magnetic resonance imaging time series. *Top* - Estimated AoT strength across regions ( $\bar{\tau}$ ) as a function of the number of available samples at rest (left) and for seven different tasks (center, right), with central lines denoting the mean over regions of interest, and surfaces the standard error of the mean. *Bottom* - Distribution of  $\tau$  across regions using  $n_s = 8000$  time points for estimation in non-causal surrogate data (shown here, for indicative purposes, when derived from resting state time courses), at rest, and in seven tasks. Emot.: emotion. WM: working memory.

47 For task paradigms (middle and right panels),  $\bar{\tau}$  also progressively stabilized as more samples  
 48 were used, but the asymptotic values differed from case to case: while no sizeable  $\bar{\tau}$  was detected  
 49 for the gambling (purple) and emotion (yellow) tasks, it was negative for the social task (pink),  
 50 and positive for the others at varying intensities. The largest AoT was obtained for the motor task,  
 51 at  $\bar{\tau} \approx 0.02$ . Thus, whole-brain AoT strength also varies as a function of the cognitive task being  
 52 performed. The negative AoT found in the social task is surprising and suggests that a model  
 53 assumption has been violated, *e.g.*, the presence of an important non-observed variable, or spatial  
 54 variation in hemodynamic delays.

55 For subsequent analyses, we focused on the results obtained using  $n_s^* = 8000$  samples, as AoT  
 56 convergence is observed with this amount of data. Fig. 2 (bottom) shows estimated AoT strength

57  $\tau$  across regions as a violin plot for each paradigm, as well as when quantified from surrogate data  
 58 having undergone amplitude-adjusted phase randomization<sup>24</sup>, *i.e.*, non-causal null data. In the  
 59 null case,  $\tau$  was close to zero for all regions, spanning a narrower range of values than for any  
 60 paradigm. With the exception of the emotion and gambling tasks, while median  $\tau$  across regions  
 61 was close to zero, mean  $\tau$  was not, denoting that the aforementioned whole-brain causal effects are  
 62 induced by a subset of brain areas.

### 63 Mapping the causal brain

64 To determine which brain regions exhibit a significant AoT, we compared them to their re-  
 65 spective non-causal null distributions<sup>24</sup>. Fig. 3A shows the results at rest (left), and for the motor  
 66 task when analyzing full recordings (center) or only task epochs (*i.e.*, having excluded baseline  
 67 periods, right). Fig. 3B summarizes network contributions to causal effects in all paradigms where

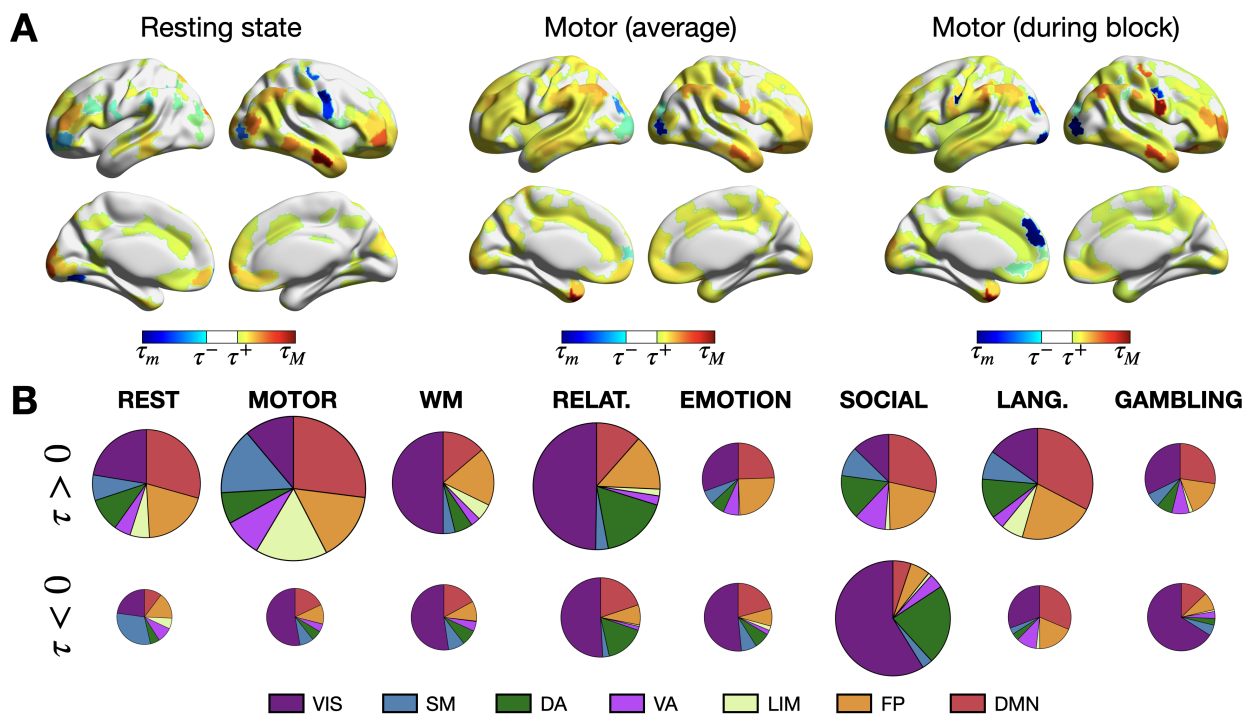

Figure 3: Distinct regional arrow-of-time patterns are observed across paradigms. *A* - At rest (left), for the full motor task (middle) and when only motor task epochs are considered (right), significant regions in terms of AoT strength.  $\tau_m$  ( $\tau_M$ ): minimum (maximum) value of  $\tau$ ,  $\tau^-$  ( $\tau^+$ ): lower (upper) significance threshold at  $p = 0.05$  using Bonferroni correction. *B* - For each analyzed paradigm, respective contribution of each of seven canonical networks<sup>25</sup>, shown separately for positive-valued and negative-valued  $\tau$ . All areas (including non-significant ones) are included in this representation. The size of a pie chart is proportional to overall AoT strength in the paradigm at hand.

68 contributions to positive and negative  $\tau$  were distinguished. From Eq. (2), it is observed that a  
69 positive  $\tau$  corresponds to the presence of a causal *sink*, *i.e.*, the variable is the target of the causal  
70 effect. By symmetry, we associate negative values of  $\tau$  to the presence of a causal *source*, *i.e.*, the  
71 variable triggers the causal effect (details on the interpretation of positive and negative AoT values  
72 are found in the *Materials and Methods*).

73 At rest, 184 regions (43.91%) showed a significant AoT, with a mild right lateralization, and  
74 positive-valued  $\tau$  dominated (130 to 54 negative values). The most influential areas primarily  
75 spanned the temporal, prefrontal and parietal cortices, and belonged to the default mode and  
76 fronto-parietal control networks. Some canonical hubs of these high-level networks showed little  
77 significance, such as the posterior cingulate cortex. During the motor task, 284 regions (67.78%)  
78 displayed significant causal effects, with no lateralization, and positive values still dominated (214 to  
79 70 negative values). Contributions from the limbic and somatomotor networks were seen in addition  
80 to the default mode and fronto-parietal control ones. When excluding baseline moments, 333  
81 regions (79.47%) became significant, with no evident lateralization, and positive values continued  
82 to be more prominent (237 to 96 negative ones). Contributions within the somatomotor cortical  
83 stripe became stronger, and some other areas with marked negative values were also newly resolved  
84 with regard to the two above cases, such as a low-level visual region (R218, *VIS18*) and a prefrontal  
85 region (R178, *PFC13*). Overall, these result support the presence of stronger causal mechanisms  
86 when a subject engages into the motor task as compared to the resting state.

87 More broadly across all task paradigms (Fig. 3B), negative-valued  $\tau$  was consistently primarily  
88 observed within the visual network, indicating that it always acts as a causal trigger (note that this  
89 effect is not observed at rest). This network was also dominant in terms of positive contributions  
90 for the working memory and the relational tasks, indicating that it also acts as a causal target in  
91 these tasks.

## 92 *From causal maps to neural mechanisms*

93 The differences found between full and task-only recordings (Fig. 3A, middle-right) hint at  
94 strong temporal fluctuations of the AoT. To ascertain this, we performed a sliding window analysis  
95 on the motor task paradigm with a window width of  $W = 20$  time points slid by one sample

96 until a full AoT strength time course is computed for each region, and using data from all 100  
 97 subjects (Fig. 4A, top). Obtained results were contrasted to the activity time courses temporally  
 98 smoothed with a moving average filter of length  $W$ , and to dynamic functional connectivity time  
 99 courses generated using identical window settings and Pearson's correlation coefficient as functional  
 100 connectivity measure. In this latter case, we derived a regional measure by summing all functional  
 101 connections of an area to the rest of the brain within each temporal window.

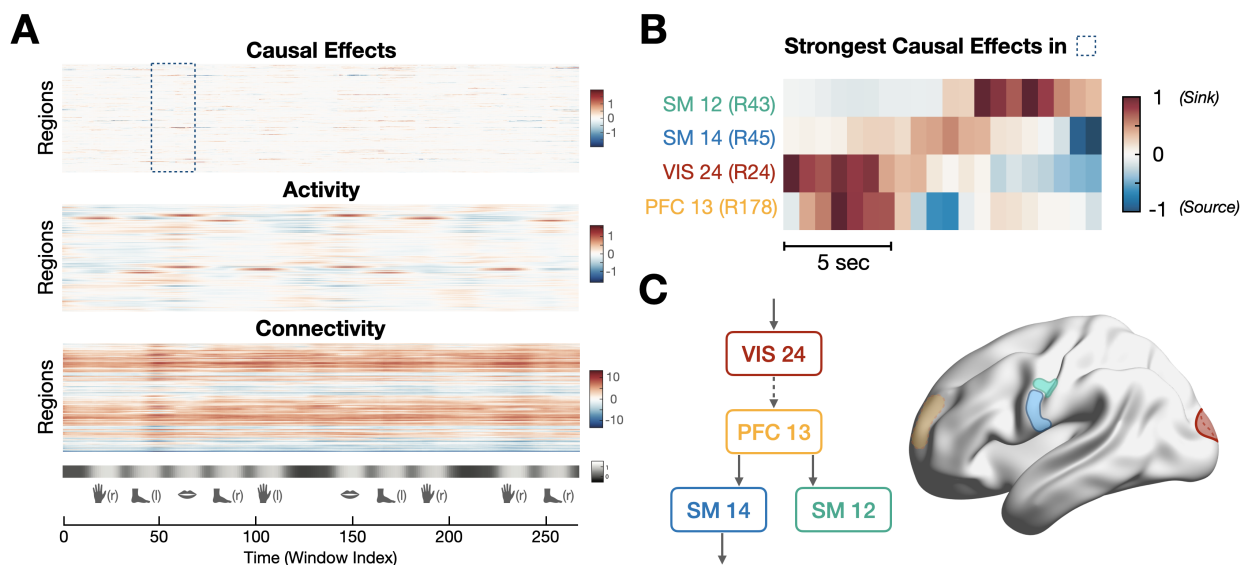

Figure 4: The arrow-of-time identifies spatiotemporally localized causal effects in the motor task. *A* - Measures of causal effects ( $\tau$ , top), activity (middle), and connectivity (bottom) during the motor task paradigm. The paradigm consists of movement epochs (left and right hands and feet, tongue), separated by resting blocks. *B* - Detailed view of causal effects in left hemispheric brain regions showing the strongest causal effects in the interval highlighted in panel *A* (tongue movement). Positive values suggest that the region acts as a sink for causal effects, while negative values suggest that the region acts as a source of causal effects. *C* - Visualization of the four brain regions in panel *B*, together with a putative causal pathway recruited when the subjects start moving their tongue.

102 As expected, clear increases in activity occurred during each of the task epochs in motor regions  
 103 subserving hand, foot or tongue movement. Connectivity of a given region to the rest of the  
 104 brain was consistently either positive (denoting a temporally stable regime with more prominent  
 105 correlation to the rest of the brain), or negative (more prominent anti-correlation). On the whole,  
 106 activity and connectivity fluctuations were relatively diffuse in time (spanning full task epochs)  
 107 and in space (involving many different areas). In contrast, causal effect time courses were highly  
 108 localized in space (typically only applying to individual regions at any given time point), and  
 109 occurred within shorter time intervals with fast transition from positive (causal target) to negative

110 (causal source) values.

111 Fig. 4B exemplifies the evolution of causal effects when transiting from baseline to the first  
112 tongue movement epoch (see highlighted area in panel A, bottom), for the four left hemispheric  
113 brain regions with the largest extent of temporal fluctuations of  $\tau$  within this interval. Consistent  
114 with the paradigm's demands, these regions were motor (*SM12* and *SM14*, for tongue movement),  
115 visual (*VIS24*, for parsing the provided instructions), and prefrontal (*PFC13*, to trigger movement  
116 execution). When the visual cue is provided to the subjects, *VIS24* becomes a causal sink. Shortly  
117 afterwards, *PFC13* becomes a sink, as visual information is treated frontally to make the decision  
118 to move. This information is then transmitted to the rest of the brain, as *PFC13* becomes a causal  
119 source (see the temporally localized negative values in its time course), while *SM14* and, later on,  
120 *SM12* become sinks. Finally, *SM14* further transmits the information and becomes a source to  
121 trigger motion. Fig. 4C schematically summarizes these observations.

## 122 Discussion

123 Here, we introduced a new AoT-sensitive metric that captures causal effects in multivariate time  
124 series. Applied to fMRI data, we showed that causal effects (i) shape brain function in all conditions,  
125 (ii) are highly localized in space and time, and (iii) reflect underlying neural mechanisms. These  
126 results are found to be robust to head motion, to the use of a different metric of non-Gaussianity, and  
127 to varying processing strategies (see *Supplementary Material*). While causality has been assessed  
128 in neuroscience and neuroimaging using other methods<sup>17,26-28</sup>, this is to the best of our knowledge  
129 the first use of the AoT to interrogate causality in neuroimaging data, thereby providing a new  
130 and natural description of the causal brain.

131 *The AoT provides a new perspective into the causal structure of time series*

132 The term 'arrow-of-time' has been coined by Sir A. Eddington almost a century ago to *express*  
133 *this one-way property of time which has no analogue in space*<sup>18</sup>. Rather surprisingly, identifying  
134 the AoT from time series is not trivial and most current AoT detection methods rely on deep  
135 learning<sup>29-31</sup>. Other approaches instead exploit simpler features such as the distribution<sup>20</sup> or the  
136 independence<sup>32</sup> of linear model residuals in forward and backward time series. The latter measures,



137 from which we defined  $\tau$  in Eq. (2), also come with a natural interpretation in terms of causality  
138 as they leverage causal inference theory to detect the AoT<sup>21,32</sup>. Therefore, the interpretation of  
139  $\tau$  in terms of causality comes with all causal inference assumptions and guarantees, which is not  
140 necessarily the case of other causality detection methods used in neuroimaging studies that encode  
141 different forms of causality<sup>23,33</sup>.

142 Identifying causal effects rather than association effects in multivariate time series comes with  
143 estimation challenges. For example, it is seen from Fig. 2 (see also *Supplementary Material* for  
144 further evidence) that at least  $\sim 1000$  fMRI time points are required to identify stable AoT patterns.  
145 In contrast, stable patterns of functional connectivity, *i.e.*, of correlation, can be identified from  
146 as little as around 100 fMRI time points<sup>34</sup>. Exploiting the non-Gaussianity of time series through  
147 kurtosis also requires cautious estimation of group effects as this metric relates to outliers in a  
148 distribution. For this reason, we took several precautions to maximize the stability of our maps:  
149 we evaluated our group (original and null) results from the *median* over folds (thus accounting  
150 for the selection of different subjects and making our results more generalizable), and adopted  
151 the most efficient sample selection scheme after evaluating several candidates (see *Supplementary*  
152 *Material*). Resorting to non-Gaussianity of linear models was important in order to unambiguously  
153 identify causal structures; indeed, linear-Gaussian approaches usually only lead to a *class* of possible  
154 models, a.k.a. Markov equivalence class, equivalent in their conditional correlation structure and  
155 from which no unique causal structure can be inferred<sup>21,35</sup>.

### 156 *The association brain vs the causal brain*

157 The current perception of brain function has been built from association metrics of func-  
158 tional neuroimaging data, thus probing the ‘association brain’. For example, functional con-  
159 nectivity<sup>2,36,37</sup>, canonical resting-state networks<sup>1,25</sup>, and most representations of brain dynamics  
160 such as (innovation-driven) co-activation patterns<sup>38,39</sup>, dynamic modes<sup>40</sup>, or sliding window-based  
161 states<sup>41–43</sup> are defined from association metrics, *e.g.*, correlation, which are blind to causality. By  
162 leveraging advances in causal inference, we defined a simple metric that exploits time series asym-  
163 metry induced by causal effects. This shift of the methodological paradigm lays the ground to a  
164 shift of canonical representations of brain function and dynamics. Furthermore, a causal represen-

165 tation of brain function also comes with promises for the cognitive and clinical use of neuroimaging  
166 data as the causal brain is expected to reflect underlying neural mechanisms<sup>9</sup>, as illustrated in  
167 Fig. 4B/C. Recent neuroimaging endeavours further substantiate this potential: after training a  
168 deep learning network to distinguish between temporal segments of forward and backward fMRI  
169 time series, Deco et al.<sup>31</sup> not only observed a variable AoT strength (inferred from classification  
170 accuracy on unseen data) across cognitive states, but also between healthy subjects and patients  
171 suffering from bipolar disorder, attention deficit hyperactivity disorder or schizophrenia. In an-  
172 other study leveraging the same framework on electrocorticography data, de la Fuente et al.<sup>44</sup> also  
173 revealed that deep sleep and ketamine-induced anesthesia lowered the differences between forward  
174 time series and their inverted counterparts, *i.e.*, decreased AoT strength.

175 Our results show that the topology of the the causal brain exhibits strong differences as com-  
176 pared to the association brain. Specifically, the dynamic tracking of the AoT in Fig. 4A revealed  
177 how remarkably localized it was with regard to functional activation and connectivity. While these  
178 two common measures reflect the overall simultaneity in activation across regions, when informa-  
179 tion has already arrived and been locally amplified (for instance, somatomotor areas in our motor  
180 task example), our AoT metric captures the arrival and departure of information. It thus more  
181 finely pinpoints the spatial entry and exit points of neural pathways, as well as their exact tem-  
182 porality. As a consequence, time-averaged representations of the causal brain might be harder to  
183 interpret as they destroy the rich temporal structure of causal effects (Fig. 3A). In particular, fur-  
184 ther work will be required to efficiently characterize the causal brain, *e.g.*, through causal networks  
185 accounting for its specificities. Finally, the present association vs causal brain dichotomy differs  
186 from the one between functional and effective connectivity<sup>2</sup>. Indeed, using the current causal in-  
187 ference nomenclature, most functional and effective connectivity measures would be classified as  
188 association measures (see, *e.g.*, the discussion on the nature of Granger causality in Pearl et al.<sup>23</sup>,  
189 Chap. I).

### 190 *Limitations and further considerations*

191 The proposed characterization of causal effects comes with the assumptions and limitations  
192 of the modelling framework in Eqs. (1)-(2). In particular, we limit our assessment to linear and

193 non-Gaussian causal effects. This is motivated by the indeterminacy inherent to linear-Gaussian  
194 assessments<sup>21</sup>, but does not mean that causal effects cannot be Gaussian. Future work will explore  
195 whether relaxing these assumptions, *e.g.*, using convergent cross mapping<sup>45</sup> or other nonlinear  
196 approaches<sup>46</sup>, provides new insights into the causal brain. Robustness to violation of causal suf-  
197 ficiency, *i.e.*, the presence of non-observed variables, would also need to be further assessed<sup>47,48</sup>,  
198 potentially by including additional experimental variables of interest such as a record of the visual  
199 cue or electrophysiological variables. Then, comparisons across paradigms must be interpreted with  
200 caution as while the total number of samples was the same, the length of the paradigms was differ-  
201 ent. Thus, a distinct number of subjects contributed to the estimates in each case. This directly  
202 relates to the question of individual as opposed to population-wise causal effects, and further work  
203 will explore the potential of the causal brain as a subject-level marker<sup>49,50</sup>. Finally, our framework  
204 is directly applicable to other neuroimaging modalities, *e.g.*, electro- or magneto-encephalography,  
205 but also outside of neuroimaging to any multivariate time series dataset.

## 206 *Conclusion*

207 Together, our findings suggest that a causal assessment of neuroimaging data indeed provides  
208 new insights into the neural mechanisms underlying brain function. More precisely, our mapping  
209 of the causal brain hints at key differences as compared to association paradigms of brain function  
210 during rest and task, *e.g.*, in terms of spatial and temporal localization. In light of this, brain  
211 imaging studies have an opportunity to move beyond classical association paradigms and unveil  
212 information contained in neuroimaging data to which current metrics are blind.

## 213 **Materials and Methods**

### 214 *Data acquisition and preprocessing*

215 We considered  $S = 100$  unrelated healthy subjects from the Human Connectome Project S900  
216 data release (46 males, 54 females, mean age =  $29.1 \pm 3.7$  years). We used fMRI recordings  
217 acquired at rest and during 7 tasks (emotion, gambling, language, motor, relational, social, working  
218 memory), for which ethical approval was obtained within the HCP. Our analyses focused on the first  
219 of two available resting state sessions, and on each available task session, purely on the left-right

220 phase encoding direction runs. Right-left phase encoding data were examined in supplementary  
221 analyses (see *Supplementary Material*).

222 To generate regional fMRI time courses, for each run of interest, minimally preprocessed data  
223 from the HCP<sup>19,51</sup> were taken as input. Nuisance signals were first removed from the voxel-wise  
224 fMRI time courses, including linear and quadratic trends, the six motion parameters and their  
225 first derivatives, as well as the average white matter and cerebrospinal fluid signals and their first  
226 derivatives. In our main analyses, the global signal was also included as a confounding variable.  
227 In additional analyses (see *Supplementary Material*), we contrasted the obtained results to those  
228 without global signal regression, and also examined the impacts of performing scrubbing as a final  
229 preprocessing step. Voxel-wise time courses were averaged within each region of a parcellation  
230 containing 400 cortical<sup>52</sup> and 19 subcortical<sup>51,53</sup> areas, for a total of  $R = 419$  parcels, and eventually  
231 z-scored. To complement these analyses, we also considered cortical atlases containing 200 and 800  
232 regions<sup>52</sup> (see *Supplementary Material*).

### 233 *AoT quantification*

234 To quantify AoT strength across brain regions, we extend a univariate metric defined previ-  
235 ously<sup>20</sup> to the multivariate case. First, we fit a first-order multivariate autoregressive model to  
236 concatenated fMRI time series population-wise<sup>54</sup>, both in the *forward* and in the *backward* direc-  
237 tions as shown in Eq. (1):

$$\begin{cases} \mathbf{x}_t = \mathbf{A}^f \cdot \mathbf{x}_{t-1} + \boldsymbol{\epsilon}_t^f & \textit{Forward model} \\ \mathbf{x}_t = \mathbf{A}^b \cdot \mathbf{x}_{t+1} + \boldsymbol{\epsilon}_t^b & \textit{Backward model} \end{cases} \quad (1)$$

where  $\mathbf{x}_t$  is of size  $R \times 1$ ,  $\mathbf{A}^f$  and  $\mathbf{A}^b$  each have size  $R \times R$ , and the residuals  $\boldsymbol{\epsilon}_t^f$  and  $\boldsymbol{\epsilon}_t^b$  are of size  $R \times 1$ . The model parameters are estimated using ordinary least squares<sup>55</sup>, and successive samples that originate from separate subjects (owing to the concatenation step) are excluded. Then, the presence of causal effects in different brain regions is assessed by comparing non-Gaussianity of forward and backward residuals. This was motivated by the fact that residuals of linear models of true cause-effect links (in this case, the forward model) are more non-Gaussian than the residuals of the reversed linear models (in this case, the backward model)<sup>21</sup>. Concretely, with  $T$  the total

number of time points, we define  $\mathbf{E}^f \triangleq \{\epsilon_t^f\}_{t=1,\dots,T}$  and  $\mathbf{E}^b \triangleq \{\epsilon_t^b\}_{t=1,\dots,T}$  as the forward and backward error distributions. Regional AoT strength  $\tau(i)$  is then estimated as:

$$\tau(i) = \underbrace{[K(\mathbf{E}^f(i)) - K(\mathcal{N}(0, 1))]^2}_{\text{Forward non-Gaussianity}} - \underbrace{[K(\mathbf{E}^b(i)) - K(\mathcal{N}(0, 1))]^2}_{\text{Backward non-Gaussianity}} \quad \forall i \in \{1, \dots, R\} \quad (2)$$

238 where  $K(\cdot)$  denotes the *kurtosis* of a distribution, and  $\mathcal{N}(0, 1)$  stands for the standard normal  
239 distribution. In the case of a marked AoT, non-Gaussianity of residuals is larger in the forward  
240 than in the backward model, and  $\tau(i)$  is positive. Region  $i$  is then a causal *sink*, primarily receiving  
241 information from the rest of the brain. By symmetry, we say that if  $\tau(i)$  is negative, brain region  
242  $i$  is a causal *source*. Note, however, that a negative value of  $\tau$  suggests that one model assumption  
243 has been violated, *e.g.*, due to the presence of an unobserved variable, or due to different delays in  
244 hemodynamic responses, and interpretation of negative values of  $\tau(i)$  should be cautious. Finally,  
245 we also devised an alternative metric relying on the Kullback-Leibler divergence to quantify AoT  
246 strength (see *Supplementary Material* for details).

#### 247 *Regional AoT patterns*

248 Using  $n_s^*$  samples, regional AoT patterns were extracted for each paradigm of interest. For the  
249 compatible tasks, the same process was also conducted after the removal of baseline epochs. To do  
250 so, individual binarized paradigm time courses (0=rest, 1=task) were convolved with the canonical  
251 haemodynamic response function from [SPM12](#), and resulting time points with a value larger/lower  
252 than 0.5 were treated as task/rest samples. Of note, since less samples are then available per  
253 subject, the obtained AoT estimates gather data from a more extended set of subjects compared  
254 to the full recording case.

255 To study the contribution of separate networks to the AoT patterns, each cortical brain region  
256 was assigned to one of seven canonical whole-brain resting state networks<sup>25</sup> through a majority  
257 voting procedure. Positive- and negative-valued AoT contributions were separately quantified.

258 *Significance assessment*

259 To assess AoT significance, comparison was performed to null data for which causal effects were  
260 destroyed. For this purpose, for each paradigm at hand, amplitude-adjusted phase randomization<sup>24</sup>  
261 was applied to the original time courses to generate  $n_n = 100$  null realizations. We considered this  
262 surrogate procedure in order to destroy causal effects while preserving the original auto-correlation  
263 structure and sampling distribution, including potential non-Gaussian effects. For each set of null  
264 data, using  $n_s^*$  samples, AoT strength was calculated across 100 folds, and the median was taken as  
265 an estimate of null regional AoT strength. The mean and standard deviation were quantified for  
266 each regional null distribution, and  $\tau$  was deemed significant if it exceeded the Bonferroni-corrected  
267  $\frac{2.5}{R}$ <sup>th</sup> or  $(100 - \frac{2.5}{R})$ <sup>th</sup> null percentiles ( $\tau^-$  and  $\tau^+$  in Fig. 3, respectively).

268 *Software availability*

269 All the scripts used in this work were implemented and tested in MATLAB, versions 2014b,  
270 2020b and 2021a (MathWorks, Natick, MA, USA). They can be freely downloaded from the fol-  
271 lowing link: [https://github.com/TiBiUan/AoT\\_Benchmarking.git](https://github.com/TiBiUan/AoT_Benchmarking.git). For figure generation, we used  
272 the *cbrewer* and *BrainNet Viewer*<sup>56</sup> (version 1.7) utilities.

273 **Acknowledgements**

274 RL acknowledges support by the Swiss National Centre of Competence in Research - Evolving  
275 Language (grant number 51NF40\_180888). MGP was supported by the CIBM Center for Biomed-  
276 ical Imaging, a Swiss research center of excellence founded and supported by Lausanne University  
277 Hospital (CHUV), University of Lausanne (UNIL), Ecole Polytechnique Fédérale de Lausanne  
278 (EPFL), University of Geneva (UNIGE) and Geneva University Hospitals (HUG).

## References

- [1] Damoiseaux, J., Rombouts, S., Barkhof, F., Scheltens, P., Stam, C., Smith, S.M., et al. Consistent resting-state networks across healthy subjects. *Proceedings of the national academy of sciences* 2006;103(37):13848–13853.
- [2] Friston, K.J.. Functional and effective connectivity: a review. *Brain connectivity* 2011;1(1):13–36.
- [3] Greicius, M.D., Krasnow, B., Reiss, A.L., Menon, V.. Functional connectivity in the resting brain: a network analysis of the default mode hypothesis. *Proceedings of the National Academy of Sciences* 2003;100(1):253–258.
- [4] van den Heuvel, M.P., Mandl, R.C.W., Kahn, R.S., Hulshoff Pol, H.E.. Functionally linked resting-state networks reflect the underlying structural connectivity architecture of the human brain. *Human brain mapping* 2009;30(10):3127–41. doi:[10.1002/hbm.20737](https://doi.org/10.1002/hbm.20737).
- [5] Drysdale, A.T., Grosenick, L., Downar, J., Dunlop, K., Mansouri, F., Meng, Y., et al. Resting-state connectivity biomarkers define neurophysiological subtypes of depression. *Nat Med* 2017;23(1):28–38. doi:[10.1038/nm.4246](https://doi.org/10.1038/nm.4246).
- [6] Bassett, D.S., Nelson, B.G., Mueller, B.A., Camchong, J., Lim, K.O.. Altered resting state complexity in schizophrenia. *Neuroimage* 2012;59(3):2196–207. doi:[10.1016/j.neuroimage.2011.10.002](https://doi.org/10.1016/j.neuroimage.2011.10.002).
- [7] Anderson, J.S., Nielsen, J.A., Froehlich, A.L., DuBray, M.B., Druzgal, T.J., Cariello, A.N., et al. Functional connectivity magnetic resonance imaging classification of autism. *Brain* 2011;134(Pt 12):3742–54. doi:[10.1093/brain/awr263](https://doi.org/10.1093/brain/awr263).
- [8] Reid, A.T., Headley, D.B., Mill, R.D., Sanchez-Romero, R., Uddin, L.Q., Marinazzo, D., et al. Advancing functional connectivity research from association to causation. *Nat Neurosci* 2019;22(11):1751–1760. doi:[10.1038/s41593-019-0510-4](https://doi.org/10.1038/s41593-019-0510-4).
- [9] Weichwald, S., Peters, J.. Causality in cognitive neuroscience: Concepts, challenges, and distributional robustness. *Journal of Cognitive Neuroscience* 2021;33(2):226–247. doi:[https://doi.org/10.1162/jocn\\_a\\_01623](https://doi.org/10.1162/jocn_a_01623).
- [10] Siddiqi, S.H., Kording, K.P., Parvizi, J., Fox, M.D.. Causal mapping of human brain function. *Nature Reviews Neuroscience* 2022;URL: <https://doi.org/10.1038/s41583-022-00583-8>. doi:[10.1038/s41583-022-00583-8](https://doi.org/10.1038/s41583-022-00583-8).
- [11] Friston, K.J., Harrison, L., Penny, W.. Dynamic causal modelling. *Neuroimage* 2003;19(4):1273–1302.
- [12] Friston, K.. Causal modelling and brain connectivity in functional magnetic resonance imaging. *PLoS Biol* 2009;7(2):e1000033.
- [13] Valdés-Sosa, P.A., Sánchez-Bornot, J.M., Lage-Castellanos, A., Vega-Hernández, M., Bosch-Bayard, J., Melie-García, L., et al. Estimating brain functional connectivity with sparse multivariate autoregression. *Philos Trans R Soc Lond B Biol Sci* 2005;360(1457):969–81. doi:[10.1098/rstb.2005.1654](https://doi.org/10.1098/rstb.2005.1654).
- [14] Rogers, B.P., Katwal, S.B., Morgan, V.L., Asplund, C.L., Gore, J.C.. Functional mri and multivariate autoregressive models. *Magnetic resonance imaging* 2010;28(8):1058–1065.
- [15] Barnett, L., Seth, A.K.. The mvvgc multivariate granger causality toolbox: a new approach to granger-causal inference. *J Neurosci Methods* 2014;223:50–68. doi:[10.1016/j.jneumeth.2013.10.018](https://doi.org/10.1016/j.jneumeth.2013.10.018).
- [16] Barrett, A.B., Barnett, L., Seth, A.K.. Multivariate granger causality and generalized variance. *Phys Rev E Stat Nonlin Soft Matter Phys* 2010;81(4 Pt 1):041907. doi:[10.1103/PhysRevE.81.041907](https://doi.org/10.1103/PhysRevE.81.041907).
- [17] Seth, A.K., Barrett, A.B., Barnett, L.. Granger causality analysis in neuroscience and neuroimaging. *J Neurosci* 2015;35(8):3293–7. doi:[10.1523/JNEUROSCI.4399-14.2015](https://doi.org/10.1523/JNEUROSCI.4399-14.2015).
- [18] Eddington, A.S.. *The Nature of the Physical World - Chap. V*. Cambridge University Press; 1928.
- [19] Van Essen, D.C., Smith, S.M., Barch, D.M., Behrens, T.E., Yacoub, E., Ugurbil, K., et al. The wu-minn human connectome project: an overview. *Neuroimage* 2013;80:62–79.
- [20] Hernández-Lobato, J., Morales-Mombiola, P., Suárez, A.. Gaussianity measures for detecting the direction of causal time series. *IJCAI International Joint Conference on Artificial Intelligence* 2011;:1318–1323doi:[10.5591/978-1-57735-516-8/IJCAI11-223](https://doi.org/10.5591/978-1-57735-516-8/IJCAI11-223).
- [21] Shimizu, S., Hoyer, P.O., Hyvarinen, A., Kerminen, A.. A linear non-gaussian acyclic model for causal discovery. *Journal of Machine Learning Research* 2006;7(72):2003–2030. URL: <http://jmlr.org/papers/v7/shimizu06a.html>.
- [22] Betzel, R.F., Bassett, D.S.. Multi-scale brain networks. *Neuroimage* 2017;160:73–83. doi:[10.1016/j.neuroimage.2016.11.006](https://doi.org/10.1016/j.neuroimage.2016.11.006).
- [23] Pearl, J.. *Causality: Models, reasoning, and inference*, second edition. *Causality* 2000;29. doi:[10.1017/CB09780511803161](https://doi.org/10.1017/CB09780511803161).
- [24] Theiler, J., Eubank, S., Longtin, A., Galdrikian, B., Farmer, J.D.. Testing for nonlinearity in time series: the method of surrogate data. *Physica D: Nonlinear Phenomena* 1992;58(1):77–94.

- [25] Yeo, B.T.T., Krienen, F.M., Sepulcre, J., Sabuncu, M.R., Lashkari, D., Hollinshead, M., et al. The organization of the human cerebral cortex estimated by intrinsic functional connectivity. *Journal of neurophysiology* 2011;106:1125–1165. doi:[10.1152/jn.00338.2011](https://doi.org/10.1152/jn.00338.2011).
- [26] Friston, K., Moran, R., Seth, A.K.. Analysing connectivity with granger causality and dynamic causal modelling. *Curr Opin Neurobiol* 2013;23(2):172–8. doi:[10.1016/j.comb.2012.11.010](https://doi.org/10.1016/j.comb.2012.11.010).
- [27] Roebroeck, A., Formisano, E., Goebel, R.. The identification of interacting networks in the brain using fmri: Model selection, causality and deconvolution. *Neuroimage* 2011;58(2):296–302. doi:[10.1016/j.neuroimage.2009.09.036](https://doi.org/10.1016/j.neuroimage.2009.09.036).
- [28] Cekic, S., Grandjean, D., Renaud, O.. Time, frequency, and time-varying granger-causality measures in neuroscience. *Stat Med* 2018;37(11):1910–1931. doi:[10.1002/sim.7621](https://doi.org/10.1002/sim.7621).
- [29] Wei, D., Lim, J.J., Zisserman, A., Freeman, W.T.. Learning and using the arrow of time. In: *Proceedings of the IEEE Conference on Computer Vision and Pattern Recognition (CVPR)*. 2018,.
- [30] Seif, A., Hafezi, M., Jarzynski, C.. Machine learning the thermodynamic arrow of time. *Nature Physics* 2020;17(1):105–113. URL: <https://doi.org/10.1038/s41567-020-1018-2>. doi:[10.1038/s41567-020-1018-2](https://doi.org/10.1038/s41567-020-1018-2).
- [31] Deco, G., Perl, Y., Sitt, J., Tagliazucchi, E., Kringelbach, M.. Deep learning the arrow of time in brain activity: characterising brain-environment behavioural interactions in health and disease. *bioRxiv* 2021;.
- [32] Bauer, S., Schölkopf, B., Peters, J.. The arrow of time in multivariate time series. *Proceedings of Machine Learning Research* 2016;48:2043–2051.
- [33] White, H., Chalak, K., Lu, X.. Linking granger causality and the pearl causal model with settable systems. In: Popescu, F., Guyon, I., editors. *Proceedings of the Neural Information Processing Systems Mini-Symposium on Causality in Time Series*; vol. 12 of *Proceedings of Machine Learning Research*. Vancouver, Canada: PMLR; 2011, p. 1–29. URL: <https://proceedings.mlr.press/v12/white11.html>.
- [34] Van Dijk, K.R.A., Hedden, T., Venkataraman, A., Evans, K.C., Lazar, S.W., Buckner, R.L.. Intrinsic functional connectivity as a tool for human connectomics: theory, properties, and optimization. *J Neurophysiol* 2010;103(1):297–321. doi:[10.1152/jn.00783.2009](https://doi.org/10.1152/jn.00783.2009).
- [35] Spirtes, P., Glymour, C., Scheines, R.. *Causation, Prediction, and Search*. The MIT Press; 2000. ISBN 978-1-4612-7650-0. doi:[10.1007/978-1-4612-2748-9](https://doi.org/10.1007/978-1-4612-2748-9).
- [36] Power, J.D., Cohen, A.L., Nelson, S.M., Wig, G.S., Barnes, K.A., Church, J.A., et al. Functional network organization of the human brain. *Neuron* 2011;72(4):665–678.
- [37] Biswal, B., Yetkin, F.Z., Haughton, V.M., Hyde, J.S.. Functional connectivity in the motor cortex of resting human brain using echo-planar mri. *Magnetic resonance in medicine* 1995;34:537–541.
- [38] Liu, T.T.. Noise contributions to the fmri signal: An overview. *Neuroimage* 2016;143:141–151. doi:[10.1016/j.neuroimage.2016.09.008](https://doi.org/10.1016/j.neuroimage.2016.09.008).
- [39] Karahanoglu, F.I., Van De Ville, D.. Transient brain activity disentangles fmri resting-state dynamics in terms of spatially and temporally overlapping networks. *Nat Commun* 2015;6:7751. doi:[10.1038/ncomms8751](https://doi.org/10.1038/ncomms8751).
- [40] Casorso, J., Kong, X., Chi, W., Van De Ville, D., Yeo, B.T.T., Liégeois, R.. Dynamic mode decomposition of resting-state and task fmri. *Neuroimage* 2019;194:42–54. doi:[10.1016/j.neuroimage.2019.03.019](https://doi.org/10.1016/j.neuroimage.2019.03.019).
- [41] Allen, E.A., Damaraju, E., Plis, S.M., Erhardt, E.B., Eichele, T., Calhoun, V.D.. Tracking whole-brain connectivity dynamics in the resting state. *Cerebral cortex* 2014;24(3):663–676. doi:[10.1093/cercor/bhs352](https://doi.org/10.1093/cercor/bhs352).
- [42] Preti, M.G., Bolton, T.A., Van De Ville, D.. The dynamic functional connectome: State-of-the-art and perspectives. *Neuroimage* 2017;160:41–54. doi:[10.1016/j.neuroimage.2016.12.061](https://doi.org/10.1016/j.neuroimage.2016.12.061).
- [43] Lurie, D.J., Kessler, D., Bassett, D.S., Betzel, R.F., Breakspear, M., Kheihholz, S., et al. Questions and controversies in the study of time-varying functional connectivity in resting fmri. *Network Neuroscience* 2020;4(1):30–69.
- [44] de la Fuente, L.A., Zamberlan, F., Bocaccio, H., Kringelbach, M.L., Deco, G., Perl, Y.S., et al. Temporal irreversibility of neural dynamics as a signature of consciousness. *bioRxiv* 2021;.
- [45] Sugihara, G., May, R., Ye, H., Hsieh, C.h., Deyle, E., Fogarty, M., et al. Detecting causality in complex ecosystems. *Science* 2012;338(6106):496–500.
- [46] Runge, J., Nowack, P., Kretschmer, M., Flaxman, S., Sejdinovic, D.. Detecting and quantifying causal associations in large nonlinear time series datasets. *Science Advances* 2019;5(11).
- [47] Zhang, J.. On the completeness of orientation rules for causal discovery in the presence of latent confounders and selection bias. *Artificial Intelligence* 2008;172(16):1873 – 1896. URL: <http://www.sciencedirect.com/science/article/pii/S0004370208001008>. doi:<https://doi.org/10.1016/j.artint.2008.08.001>.
- [48] Runge, J.. Causal network reconstruction from time series: From theoretical assumptions to practical estimation. *Chaos: An Interdisciplinary Journal of Nonlinear Science* 2018;28(7):075310. URL: <https://doi.org/10.1063/1.5038100>.



- [//doi.org/10.1063/1.5025050](https://doi.org/10.1063/1.5025050). doi:10.1063/1.5025050. arXiv:<https://doi.org/10.1063/1.5025050>.
- [49] Finn, E.S., Shen, X., Scheinost, D., Rosenberg, M.D., Huang, J., Chun, M.M., et al. Functional connectome fingerprinting: identifying individuals using patterns of brain connectivity. *Nat Neurosci* 2015;18(11):1664–1671. URL: <http://dx.doi.org/10.1038/nn.4135>. doi:10.1038/nn.4135.
- [50] Van De Ville, D., Farouj, Y., Preti, M.G., Liégeois, R., Amico, E.. When makes you unique: Temporality of the human brain fingerprint. *Sci Adv* 2021;7(42):eabj0751. doi:10.1126/sciadv.abj0751.
- [51] Glasser, M.F., Sotiropoulos, S.N., Wilson, J.A., Coalson, T.S., Fischl, B., Andersson, J.L., et al. The minimal preprocessing pipelines for the human connectome project. *Neuroimage* 2013;80:105–124.
- [52] Schaefer, A., Kong, R., Gordon, E.M., Laumann, T.O., Zuo, X.N., Holmes, A.J., et al. Local-global parcellation of the human cerebral cortex from intrinsic functional connectivity mri. *Cereb Cortex* 2018;28(9):3095–3114. doi:10.1093/cercor/bhx179.
- [53] Fischl, B., Salat, D.H., Busa, E., Albert, M., Dieterich, M., Haselgrove, C., et al. Whole brain segmentation: automated labeling of neuroanatomical structures in the human brain. *Neuron* 2002;33(3):341–55. doi:10.1016/s0896-6273(02)00569-x.
- [54] Liégeois, R., Li, J., Kong, R., Orban, C., Van De Ville, D., Ge, T., et al. Resting brain dynamics at different timescales capture distinct aspects of human behavior. *Nature Communications* 2019;10(1):2317. doi:10.1038/s41467-019-10317-7.
- [55] Stoica, P., Moses, R.L.. *Spectral analysis of signals*. Pearson/Prentice Hall Upper Saddle River, NJ; 2005.
- [56] Xia, M., Wang, J., He, Y.. Brainnet viewer: a network visualization tool for human brain connectomics. *PLoS One* 2013;8(7):e68910. doi:10.1371/journal.pone.0068910.
